# Supplementary material
Source: HighWire-hosted journal article supplement (https://learnmem.cshlp.org/content/suppl/2023/09/19/30.9.175)
Supplement: Supplemental_Tables.docx [file Supplemental_Tables.docx]

**Supplements**

**Table S1.** ANOVA table of the linear mixed model results for significant four-way interaction of RTs. # *p* < .10, * *p* < .05, ** *p* < .01, *** *p* < .001.

|  |  | **df** | **F** | **p** |
| --- | --- | --- | --- | --- |
| **group** |  | 1, 45.0 | 0.01 | 0.923 |
| **session** |  | 1, 44.1 | 3.88 | 0.055# |
| **action** |  | 1, 42.4 | 5.23 | 0.027* |
| **classification** |  | 1, 45.6 | 39.65 | < 0.001*** |
| **group × session** |  | 1, 44.0 | 0.001 | 0.980 |
| **group × action** |  | 1, 42,4 | 0.45 | 0.505 |
| **session × action** |  | 1, 13915.7 | 0.70 | 0.403 |
| **group × classification** |  | 1, 45.6 | 2.57 | 0.116 |
| **session × classification** |  | 1, 13933.6 | 14.35 | < 0.001*** |
| **action × classification** |  | 1, 13910.0 | 0.09 | 0.758 |
| **group × session × action** |  | 1, 13890.7 | 2.04 | 0.153 |
| **group × session × classification** |  | 1, 13885.1 | 5.14 | 0.023* |
| **group × action × classification** |  | 1, 13907.2 | 0.12 | 0.728 |
| **session × action × classification** |  | 1, 13935.3 | 0.33 | 0.566 |
| **group × session × action × classification** |  | 1, 13930.4 | 10.78 | 0.001** |

**Table S2.** Switch costs correlated with sleep architecture. Total sleep time (TST), wake time after sleep onset (WASO) and movement time (MT), latency (from sleep onset) of stage 2 sleep and SWS, as well as time spent in sleep stages 1, 2, SWS (3 + 4), REM sleep and NonREM sleep (stage 2 + SWS) are indicated in minutes. # *p* < .10, * *p* < .05.

|  |  | **TST** | **WASO & MT** | **Stage 2 latency** | **SWS latency** | **Stage 1** | **Stage 2** | **SWS** | **REM** | **NonREM** |
| --- | --- | --- | --- | --- | --- | --- | --- | --- | --- | --- |
| **∆ Action-switch costs** |  | .16 | -.07 | .01 | .36# | .20 | .35 | -.31 | .08 | .02 |
| **∆ Classification-switch costs** |  | .50* | -.44* | -.02 | .18 | -.02 | .25 | .15 | .20 | .48* |
| **∆ Full-switch costs** |  | .16 | .05 | .28 | .10 | .31 | -.05 | .14 | -.12 | .10 |

**Table S3.** Switch costs correlated with sleep oscillations. Slow spindles (at F3/F4), fast spindles (at C3/C4, P3/P4), SOs (at F3/F4, C3/C4, P3/P4) are identified during stage 2 sleep, SWS, and NonREM sleep, respectively. Theta activity are identified during REM sleep. So-spindle couplings are determined for slow and fast spindles, respectively. Correlation coefficients indicate the corresponding individual channels, with F3, C3, P3 on the left and F4, C4, P4 on the right. # *p* < .10, * *p* < .05, ** *p* < .01.

| **Sleep oscillations during stage 2 sleep** | | | | | | |
| --- | --- | --- | --- | --- | --- | --- |
|  |  |  |  |  |  |  |
|  |  |  |  | **∆ Action-switch costs** | **∆ Classification-switch costs** | **∆ Full-switch costs** |
| **Slow spindles** | Frontal | *Count* |  | .45*/.44* | .49*/.51* | .36#/.38# |
|  |  | *Density* |  | .33/.31 | .45*/.47* | .46*/.47* |
|  |  | *Amplitude* |  | -.30/-.29 | .09/.02 | -.02/-.05 |
|  |  |  |  |  |  |  |
| **Fast spindles** | Central | *Count* |  | .45*/.54* | .48*/.51* | .21/.22 |
|  |  | *Density* |  | .35/.33 | .56**/.52* | .44*/.43* |
|  |  | *Amplitude* |  | -.23/-.11 | .18/.20 | .08/.21 |
|  |  |  |  |  |  |  |
|  | Parietal | *Count* |  | .39#/.35 | .50*/.45* | .24/.22 |
|  |  | *Density* |  | .19/.11 | .52*/.45* | .41*/.39# |
|  |  | *Amplitude* |  | -.12/-.15 | .24/.18 | .24/.21 |
|  |  |  |  |  |  |  |
| **SOs** | Frontal | *Count* |  | .19/.22 | .24/.16 | -.21/-.28 |
|  |  | *Density* |  | .08/.12 | .18/.06 | -.27/-.39# |
|  |  | *Amplitude* |  | -.27/-.29 | .12/.04 | .14/.10 |
|  |  |  |  |  |  |  |
|  | Central | *Count* |  | .17/.41# | .27/.39# | -.26/-.14 |
|  |  | *Density* |  | -.01/.31 | .20/.37 | -.37#/-.21 |
|  |  | *Amplitude* |  | -.37#/-.35 | .11/.10 | .07/.06 |
|  |  |  |  |  |  |  |
|  | Parietal | *Count* |  | .26/.21 | .29/.28 | -.22/-.25 |
|  |  | *Density* |  | .14/.10 | .25/.26 | -.27/-.33 |
|  |  | *Amplitude* |  | -.30/-.27 | .16/.13 | .14/.18 |
|  |  |  |  |  |  |  |
| **SO-spindle (slow)** | Frontal | *Count* |  | .18/.19 | .30/.28 | -.04/-.07 |
|  |  | *Density* |  | .07/.08 | .23/.23 | -.00/-.04 |
|  |  |  |  |  |  |  |
| **SO-spindle (fast)** | Central | *Count* |  | .18/.26 | .23/.29 | -.18/-.19 |
|  |  | *Density* |  | .08/.14 | .17/.23 | -.21/-.23 |
|  |  |  |  |  |  |  |
|  | Parietal | *Count* |  | .26/.17 | .31/.30 | -.12/-.19 |
|  |  | *Density* |  | .18/.08 | .26/.26 | -.13/-.21 |
|  |  |  |  |  |  |  |
| **Sleep oscillations during SWS** | | | | | | |
|  |  |  |  |  |  |  |
|  |  |  |  | **∆ Action-switch costs** | **∆ Classification-switch costs** | **∆ Full-switch costs** |
| **Slow spindles** | Frontal | *Count* |  | -.34/-.34 | .15/.07 | .11/.07 |
|  |  | *Density* |  | -.21/-.22 | .23/-.02 | .04/-.05 |
|  |  | *Amplitude* |  | -.33/-.35 | .13/.02 | -.01/-.07 |
|  |  |  |  |  |  |  |
| **Fast spindles** | Central | *Count* |  | -.31/-.40# | .06/-.00 | .03/-.02 |
|  |  | *Density* |  | -.19/-.27 | -.14/-.26 | -.10/-.18 |
|  |  | *Amplitude* |  | -.27/-.16 | .16/.15 | .05/.12 |
|  |  |  |  |  |  |  |
|  | Parietal | *Count* |  | -.30/-.27 | .06/.04 | .04/.08 |
|  |  | *Density* |  | -.19/-.11 | -.11/-.14 | -.06/-.01 |
|  |  | *Amplitude* |  | -.17/-.16 | .19/.14 | .15/.15 |
|  |  |  |  |  |  |  |
| **SOs** | Frontal | *Count* |  | -.34/-.27 | .08/.14 | .20/.20 |
|  |  | *Density* |  | .08/.14 | -.14/-.12 | -.02/-.01 |
|  |  | *Amplitude* |  | -.31/-.31 | .05/.01 | .12/.07 |
|  |  |  |  |  |  |  |
|  | Central | *Count* |  | -.32/-.30 | .06/.08 | .16/.14 |
|  |  | *Density* |  | -.11/.29 | -.26/-.17 | -.05/.05 |
|  |  | *Amplitude* |  | -.39#/-.36 | .05/.06 | .07/.06 |
|  |  |  |  |  |  |  |
|  | Parietal | *Count* |  | -.30/-.30 | .10/.13 | .19/.19 |
|  |  | *Density* |  | -.10/-.02 | -.23/-.14 | -.01/-.02 |
|  |  | *Amplitude* |  | -.30/-.28 | .11/.09 | .15/.18 |
|  |  |  |  |  |  |  |
| **SO-spindle (slow)** | Frontal | *Count* |  | -.25/-.28 | .22/.03 | .16/.06 |
|  |  | *Density* |  | -.14/-.20 | .21/-.11 | .05/-.09 |
|  |  |  |  |  |  |  |
| **SO-spindle (fast)** | Central | *Count* |  | -.33/-.33 | .03/-.00 | -.03/-.04 |
|  |  | *Density* |  | -.15/-.05 | -.20/-.21 | -.23/-.17 |
|  |  |  |  |  |  |  |
|  | Parietal | *Count* |  | -.31/-.23 | .02/.01 | -.02/.06 |
|  |  | *Density* |  | -.18/-.06 | -.23/-.20 | -.23/-.12 |
|  |  |  |  |  |  |  |
| **Sleep oscillations during NonREM sleep** | | | | | | |
|  |  |  |  |  |  |  |
|  |  |  |  | **∆ Action-switch costs** | **∆ Classification-switch costs** | **∆ Full-switch costs** |
| **Slow spindles** | Frontal | *Count* |  | .13/.14 | .51*/.47* | .38#/37# |
|  |  | *Density* |  | .14/.13 | .45*/.38# | .38#/.36# |
|  |  | *Amplitude* |  | -.30/-.30 | .11/.02 | -.00/-.04 |
|  |  |  |  |  |  |  |
| **Fast spindles** | Central | *Count* |  | .22/.25 | .56**/.55* | .25/.22 |
|  |  | *Density* |  | .30/.31 | .41#/.31 | .27/.22 |
|  |  | *Amplitude* |  | -.23/-.11 | .19/.20 | .08/.20 |
|  |  |  |  |  |  |  |
|  | Parietal | *Count* |  | .17/.16 | .58**/.51* | .29/.29 |
|  |  | *Density* |  | .19/.16 | .41*/.30 | .29/.27 |
|  |  | *Amplitude* |  | -.12/-.15 | .23/.17 | .23/.20 |
|  |  |  |  |  |  |  |
| **SOs** | Frontal | *Count* |  | -.26/-.18 | .24/.25 | .09/.07 |
|  |  | *Density* |  | -.35/-.26 | -.03/-.02 | .06/.01 |
|  |  | *Amplitude* |  | -.31/-.32 | .07/.00 | .12/.08 |
|  |  |  |  |  |  |  |
|  | Central | *Count* |  | -.28/-.12 | .18/.29 | .07/.08 |
|  |  | *Density* |  | -.37/-.18 | -.06/.04 | .02/.05 |
|  |  | *Amplitude* |  | -.40#/-.37 | .06/.06 | .07/.07 |
|  |  |  |  |  |  |  |
|  | Parietal | *Count* |  | -.22/-.23 | .23/.27 | .12/.09 |
|  |  | *Density* |  | -.31/-.32 | .01/.05 | .07/.03 |
|  |  | *Amplitude* |  | -.31/-.29 | .12/.09 | .15/.18 |
|  |  |  |  |  |  |  |
| **SO-spindle (slow)** | Frontal | *Count* |  | -.15/-.19 | .34/.14 | .13/.03 |
|  |  | *Density* |  | -.17/-.22 | .27/.02 | .12/-.02 |
|  |  |  |  |  |  |  |
| **SO-spindle (fast)** | Central | *Count* |  | -.12/-.05 | .19/.22 | -.16/-.18 |
|  |  | *Density* |  | -.14/-.05 | .04/.08 | -.20/-.21 |
|  |  |  |  |  |  |  |
|  | Parietal | *Count* |  | -.05/-.05 | .24/.22 | -.10/-.09 |
|  |  | *Density* |  | -.05/-.06 | .11/.10 | -.13/-.13 |
|  |  |  |  |  |  |  |
| **Sleep oscillations during REM sleep** | | | | | | |
|  |  |  |  |  |  |  |
|  |  |  |  | **∆ Action-switch costs** | **∆ Classification-switch costs** | **∆ Full-switch costs** |
| **Theta activity** | Frontal | *Power* |  | -.24/-.19 | -.17/-.25 | -.02/-.07 |
|  |  |  |  |  |  |  |
|  | Central | *Power* |  | -.39#/-.32 | -.10/-.17 | .04/-.05 |
|  |  |  |  |  |  |  |
|  | Parietal | *Power* |  | -.31/-.33 | -.13/-.11 | .04/-.00 |
|  |  |  |  |  |  |  |

**Table S4.** Correlations between sleep parameters and overall accuracy performance. Correlation coefficients for sleep oscillations indicate individual channels of corresponding scalp sites, with F3, C3, P3 on the left and F4, C4, P4 on the right. # *p* < .10, * *p* < .05, ** *p* < .01.

| **Overall Accuracy correlate with sleep parameters** | | **TST** | **WASO & MT** | **Stage 2 latency** | **SWS latency** | **Stage 1** | **Stage 2** | **SWS** | **REM** | **NonREM** |
| --- | --- | --- | --- | --- | --- | --- | --- | --- | --- | --- |
| -.12 | .13 | -.08 | -.41# | -.20 | .21 | .28 | -.19 | .11 |
|  | | **NonREM sleep** | | | **Stage 2 sleep** | | | **SWS** | | |
| Count | Density | Amplitude | Count | Density | Amplitude | Count | Density | Amplitude |
| **Slow spindles** | Frontal | -.20/-.15 | -.25/-.18 | .43*/.45* | -.33/-.31 | -.28/-.25 | .42#/.43* | .11/.16 | -.06/.05 | .42*/.47* |
|  |  |  |  |  |  |  |  |  |  |  |
| **Fast spindles** | Central | -.12/-.12 | -.29/-.28 | .39#/.31 | -.41#/-.43# | -.47*/-.44* | .39#/.31 | .38#/.41# | .36#/.41# | .39#/.31 |
|  | Parietal | -.23/-.20 | -.40#/-.34 | .26/.23 | -.48*/-.42* | -.50*/-.40# | .26/.24 | .35/.32 | .36#/.31 | .29/.24 |
|  |  |  |  |  |  |  |  |  |  |  |
| **SOs** | Frontal | .25/.20 | .24/.20 | .38#/.41# | .02/.01 | .13/.14 | .39#/.42* | .21/.17 | -.34/-.32 | .35/.38# |
|  | Central | .31/.24 | .33/.24 | .37#/.38# | .13/-.04 | .32/.08 | .37#/.40# | .23/.23 | -.04/-.29 | .36#/.36 |
|  | Parietal | .32/.28 | .36#/.31 | .26/.25 | .13/.12 | .27/.24 | .28/.29 | .25/.21 | .03/-.10 | .26/.24 |
